# Supplementary material for: Abnormalities in the genes that encode Large Amino Acid Transporters increase the risk of Autism Spectrum Disorder
Source: PubMed Central journal article supplement (PMC6978257; doi:10.1002/mgg3.1036), 2019-11-07
Supplement: MGG3-8-e1036-s001.pdf [file MGG3-8-e1036-s001.pdf]

Supplemental files.

Table S1. Primer sequences for LAT genes.

| <b>SLC3A2</b>        |                                             |
|----------------------|---------------------------------------------|
| SLC3A2 M13-1 F       | gtaaaacgacggccagCCCTCTAACCTGTTCTGAGC        |
| SLC3A2 M13-1 R       | caggaaacagctatgacTGACATACTTTCCCGAAATGG      |
| SLC3A2 M13-2new F    | gtaaaacgacggccagAGAGTTGGGGTCTCACTGTGT       |
| SLC3A2 M13-2new R    | caggaaacagctatgacATTACCTATCATCTCGGCATTCTG   |
| SLC3A2 M13-3 F       | gtaaaacgacggccagCCACTGTGCCCAACCATACT        |
| SLC3A2 M13-3 R       | caggaaacagctatgacAAAGACAAATTCTACCAGATAGCAAG |
| SLC3A2 M13-4 F       | gtaaaacgacggccagGGTCCAGGTAGGGGTTGAG         |
| SLC3A2 M13-4 R       | caggaaacagctatgacCTAGATCCGTCTGGGGACAG       |
| SLC3A2 M13-5 F       | gtaaaacgacggccagCTTAGGCGCTGGGAGAAGG         |
| SLC3A2 M13-5 R       | caggaaacagctatgacAAGTTCTAGCCTACTTTTCCTCTGG  |
| SLC3A2 M13-6 F       | gtaaaacgacggccagTGA CTTGCATTTGTGATTCCT      |
| SLC3A2 M13-6 R       | caggaaacagctatgacTCTACAGGGCTTGCTGTGAA       |
| SLC3A2 M13-7-8 F     | gtaaaacgacggccagGAGGTTTAGTGTGGGCTGGA        |
| SLC3A2 M13-7-8 R     | caggaaacagctatgacAGGCCTAGCACTCCACTGAG       |
| SLC3A2 M13-9-10 F    | gtaaaacgacggccagCTGGCCCCATTCTTTCTTGT        |
| SLC3A2 M13-9-10 R    | caggaaacagctatgacGCCATCCCAGAATCATCA         |
| SLC3A2 M13-11-12 F   | gtaaaacgacggccagACAGATGTGAGCCACCATGC        |
| SLC3A2 M13-11-12 R   | caggaaacagctatgacAGGGCCTGGGAAGGAAAG         |
| <b>SLC7A5</b>        |                                             |
| SLC7A5-Ex1-new-M13-F | gtaaaacgacggccagGCCGAGGAGAAGGAAGAGG         |
| SLC7A5-Ex1-new-M13-R | caggaaacagctatgacTACTCACGCACGCAGAGG         |
| SLC7A5 M13-2 F       | gtaaaacgacggccagCTGAGCTGGCGTCTGTCTG         |
| SLC7A5 M13-2 R       | caggaaacagctatgacTGAAGGACACACAGGCAAAG       |
| SLC7A5 M13-3 F       | gtaaaacgacggccagGACCTCTGTTCA GCGCTCTC       |
| SLC7A5 M13-3 R       | caggaaacagctatgacTGGACACGTCAGGGACTGTA       |
| SLC7A5 M13-4 F       | gtaaaacgacggccagCGGTGATTTATTTCCCTGA         |
| SLC7A5 M13-4 R       | caggaaacagctatgacCTGCTTCTGCCTCACATTA        |
| SLC7A5 M13-5 F       | gtaaaacgacggccagCACAGGGTTTGGCCTTCA          |
| SLC7A5 M13-5 R       | caggaaacagctatgacCTGGCCACAGCCTCTCAG         |
| SLC7A5 M13-6 F new   | gtaaaacgacggccagCCAGCTCACTGGTTGTGC          |
| SLC7A5 M13-6 R       | caggaaacagctatgacATGTTGAACCTGGCCATGAG       |
| SLC7A5 M13-7 F       | gtaaaacgacggccagCCAGAGAGGCCAGACAAG          |
| SLC7A5 M13-7 R       | caggaaacagctatgacCTGTGGCAGCCTCCCTCT         |
| SLC7A5 M13-8 F       | gtaaaacgacggccagGACCTTGCATGTTGCTCAGA        |
| SLC7A5 M13-8 R       | caggaaacagctatgacCTCCAACTCAGGGTCCTT         |
| SLC7A5 M13-9 F       | gtaaaacgacggccagGGTGACCTGGAAGTCAGCAG        |
| SLC7A5 M13-9 R       | caggaaacagctatgacGACGCCTCTCAACTCCCTTC       |

|                   |                                          |
|-------------------|------------------------------------------|
| SLC7A5 M13-10 F   | gtaaaacgacggccagCAGCCCCAGGCTAACAC        |
| SLC7A5 M13-10 R   | caggaaacagctatgacCACAGCAGCCTCCACTGC      |
| <b>SLC7A8</b>     |                                          |
| SLC7A8 M13-1 F    | gtaaaacgacggccagAATTCAAAGCTCTCTCCAAT     |
| SLC7A8 M13-1 R    | caggaaacagctatgacATCTCACAGGAGGACCACCA    |
| SLC7A8 M13-2 F    | gtaaaacgacggccagGAAATGAGACCACCCTCAA      |
| SLC7A8 M13-2 R    | caggaaacagctatgacTGGCTTTTTCCAATCTGACC    |
| SLC7A8 M13-3 F    | gtaaaacgacggccagCTCTCCCCTGATGGCTCTG      |
| SLC7A8 M13-3 R    | caggaaacagctatgacCGCTCCAGCCTGAGTGAC      |
| SLC7A8 M13-4 F    | gtaaaacgacggccagGCATCATGCAGCCAGATACA     |
| SLC7A8 M13-4 R    | caggaaacagctatgacTACATGCAAGGGGAGGAAAG    |
| SLC7A8 M13-5 F    | gtaaaacgacggccagGGCCCCTGACTTGTCTCAC      |
| SLC7A8 M13-5 R    | caggaaacagctatgacATGGACACCTGCTCCCTCTT    |
| SLC7A8 M13-5new F | gtaaaacgacggccagAGTTGGTGTTCATTGCCACAG    |
| SLC7A8 M13-5new R | caggaaacagctatgacACGGCAAATGGTTTAAGTGC    |
| SLC7A8 M13-6 F    | gtaaaacgacggccagCCTGGACTCCATGGCAAG       |
| SLC7A8 M13-6 R    | caggaaacagctatgacCAGGCAAGTCTATGTCTGCATT  |
| SLC7A8 M13-7 F    | gtaaaacgacggccagGAGTGAAGTGGGAGCTGAGG     |
| SLC7A8 M13-7 R    | caggaaacagctatgacCAAAGTGCACAGCAGAGTGG    |
| SLC7A8 M13-8 F    | gtaaaacgacggccagGCAGAAGGTAGGCAAGGATG     |
| SLC7A8 M13-8 R    | caggaaacagctatgacGAGAGGGAGGTGTGTGGAGA    |
| SLC7A8 M13-9 F    | gtaaaacgacggccagGAATATCTTTCGGATCACTGATGA |
| SLC7A8 M13-9 R    | caggaaacagctatgacTGCAGCTAGAACCATAGAGGAA  |
| SLC7A8 M13-10 F   | gtaaaacgacggccagAGAATGCCCCAGTCCCTAGT     |
| SLC7A8 M13-10 R   | caggaaacagctatgacCTAGATCTCCTGGCCCTGGT    |
| SLC7A8 M13-11 F   | gtaaaacgacggccagCCAGGTTGGTGGGATACTCA     |
| SLC7A8 M13-11 R   | caggaaacagctatgacCAAGGCAGGGAGGTAGGATA    |
